# Supplementary material for: Erectile dysfunction in patients with anxiety disorders: a systematic review
Source: PubMed Central journal article supplement (PMC8964411; doi:10.1038/s41443-020-00405-4), 2021-02-18
Supplement: 41443_2020_405_MOESM1_ESM.pdf [file 41443_2020_405_MOESM1_ESM.pdf]

## Appendix 1 - Full search strategy utilised

### Search strategy

- PubMed Search
  - (Anxiety disorders OR Neurotic Disorders OR Social Phobia OR Anxiety OR Generalised anxiety disorder OR GAD OR Obsessive-compulsive disorder OR OCD OR neurosis OR Panic disorder OR post-traumatic stress disorder OR PTSD) AND (erectile dysfunction OR Impotence OR erectile function OR ED OR Sexual dysfunction OR psychosexual dysfunctions) AND (International Index of Erectile Function OR IIEF\* OR Erection Hardness Score OR EHS OR Sexual Health Inventory for Men OR SHIM)
  
- Embase Search (via Ovid)
  - ((Anxiety disorders OR Neurotic Disorders OR Social Phobia OR Anxiety OR Generalised anxiety disorder OR GAD OR Obsessive-compulsive disorder OR OCD OR neurosis OR Panic disorder OR post-traumatic stress disorder OR PTSD) AND (erectile dysfunction OR Impotence OR erectile function OR ED OR Sexual dysfunction OR psychosexual dysfunctions) AND (International Index of Erectile Function OR IIEF\* OR Erection Hardness Score OR EHS OR Sexual Health Inventory for Men OR SHIM)).af.
  
- PsycINFO (via Ovid)
  - ((Anxiety disorders OR Neurotic Disorders OR Social Phobia OR Anxiety OR Generalised anxiety disorder OR GAD OR Obsessive-compulsive disorder OR OCD OR neurosis OR Panic disorder OR post-traumatic stress disorder OR PTSD) AND (erectile dysfunction OR Impotence OR erectile function OR ED OR Sexual dysfunction OR psychosexual dysfunctions) AND (International Index of Erectile Function OR IIEF\* OR Erection Hardness Score OR EHS OR Sexual Health Inventory for Men OR SHIM)).af.
